# Supplementary material for: Early and Direct Endoscopic Stone Removal in the Moderate Grade of Acute Cholangitis with Choledocholithiasis Was Safe and Effective: A Prospective Study
Source: MDPI journal article supplement (doi:10.3390/life12122000), 2022-11-30
Supplement: s1 [file s1]

**Table S1.** Univariate and multivariate analyses of the factors associated with reduced length of hospitalization ( $\leq 10$  days).

| Variants                 | Hospital Stay     | Hospital Stay | Univariate         | <i>p</i> -Value | Multivariate  | <i>p</i> -Value |
|--------------------------|-------------------|---------------|--------------------|-----------------|---------------|-----------------|
|                          | ( $\leq 10$ days) | (>10 days)    | OR (95% C.I.)      |                 | OR (95% C.I.) |                 |
|                          | n = 68 (%)        | n = 55 (%)    |                    |                 |               |                 |
| <b>Clinical factors</b>  |                   |               |                    |                 |               |                 |
| Age $\geq 75$ y/o        | 29(42.6)          | 28(50.9)      | 0.907(0.339–2.426) | 0.846           |               |                 |
| Male gender              | 41(60.3)          | 31(56.4)      | 0.707(0.300–1.667) | 0.428           |               |                 |
| BMI $\geq 24$            | 30(57.7)          | 27(60.0)      | 0.755(0.287–1.984) | 0.569           |               |                 |
| Diabetes                 | 16(23.5)          | 19(34.5)      | 1.659(0.499–5.513) | 0.409           |               |                 |
| Hypertension             | 36(52.9)          | 36(65.5)      | 1.739(0.605–5.002) | 0.305           |               |                 |
| Cerebrovascular accident | 3(4.4)            | 3(5.5)        | 0.428(0.058–3.140) | 0.404           |               |                 |

|                                                                 |          |          |                     |       |                     |       |
|-----------------------------------------------------------------|----------|----------|---------------------|-------|---------------------|-------|
| Coronary artery disease                                         | 11(16.2) | 14(25.5) | 1.105(0.327–3.734)  | 0.872 |                     |       |
| Liver cirrhosis                                                 | 1(1.5)   | 7(12.7)  | 9.521(0.969–93.526) | 0.053 | 0.109 (0.012–0.965) | 0.046 |
| Chronic kidney disease<br>(eGFR < 60 mL/min/1.73 <sup>2</sup> ) | 5(7.4)   | 12(21.8) | 1.940(0.411–9.170)  | 0.403 |                     |       |
| Moderate acute<br>cholangitis                                   | 27(39.7) | 22(40.0) | 1.668(0.637–4.367)  | 0.298 |                     |       |
| <b>Laboratory factors</b>                                       |          |          |                     |       |                     |       |
| WBC ≥ 12,000<br>or < 4000 (×10 <sup>3</sup> /μL)                | 30(44.1) | 28(50.9) | 0.789(0.320–1.947)  | 0.607 |                     |       |
| CRP ≥ 100 (U/I)                                                 | 19(28.4) | 17(31.5) | 0.572(0.222–1.469)  | 0.245 |                     |       |
| Bilirubin ≥ 5 (mg/dL)                                           | 30(44.1) | 24(44.4) | 0.768(0.322–1.832)  | 0.551 |                     |       |

**Endoscopic factors**

|                         |          |          |                     |        |                     |       |
|-------------------------|----------|----------|---------------------|--------|---------------------|-------|
| Stone $\geq$ 1.5 cm     | 8(11.8)  | 9(16.4)  | 0.785(0.235–2.624)  | 0.695  |                     |       |
| ERBD                    | 15(22.1) | 16(29.1) | 0.452(0.179–1.141)  | 0.093  |                     |       |
| ERCP timing $\leq$ 72 h | 55(80.9) | 28(50.9) | 5.287(2.060–13.569) | <0.001 | 3.981 (1.753–9.040) | 0.001 |

---

Abbreviations: OR, odds ratio; BMI, body mass index; WBC, white blood count; CRP, C-reactive protein; ERBD, Endoscopic retrograde biliary drainage;

ERCP, endoscopic retrograde cholangiopancreatography.

**Table S2.** Univariate and multivariate analyses of the factors associated with failure of the CBD stone extraction (excluding cases with cannulation failure).

| Variants                      |          | Success Rate | Univariate          | <i>p</i> -Value | Multivariate  | <i>p</i> -Value |
|-------------------------------|----------|--------------|---------------------|-----------------|---------------|-----------------|
|                               |          | n (%)        | OR (95% C.I.)       |                 | OR (95% C.I.) |                 |
| Age (y/o)                     | ≥ 75     | 50/54 (92.6) | 5.040(0.546–46.522) | 0.154           |               |                 |
|                               | <75      | 63/64(98.4)  |                     |                 |               |                 |
| Stage of acute<br>cholangitis | Moderate | 47/49(95.9)  | 0.936(0.150–5.824)  | 0.944           |               |                 |
|                               | Mild     | 66/69(89.2)  |                     |                 |               |                 |
| CRP                           | ≥100     | 32/35(91.4)  | 3.703(0.591–23.217) | 0.162           |               |                 |
|                               | <100     | 79/81(97.5)  |                     |                 |               |                 |
| WBC ≥ 12,000                  | (+)      | 55/57(96.5)  | 0.703(0.113–4.369)  | 0.705           |               |                 |
| or < 4000 (×1000/μL)          | (-)      | 58/61(95.1)  |                     |                 |               |                 |

|                         |       |               |                      |       |                      |       |
|-------------------------|-------|---------------|----------------------|-------|----------------------|-------|
| ERCP timing             | >72 h | 35/37(94.6)   | 0.673(0.108–4.209)   | 0.672 |                      |       |
|                         | ≤72 h | 78/81(96.3)   |                      |       |                      |       |
| Diverticulum            | (+)   | 50/51(98.0)   | 0.315(0.034–2.908)   | 0.308 |                      |       |
|                         | (-)   | 63/67(94.0)   |                      |       |                      |       |
| Stone (cm)              | ≥1.5  | 13/16(81.3)   | 11.538(1.760–75.632) | 0.011 | 9.263 (1.315–65.226) | 0.025 |
|                         | <1.5  | 100/102(98.0) |                      |       |                      |       |
| Distal CBD<br>narrowing | (+)   | 25/27(92.6)   | 2.347(0.371–14.828)  | 0.352 |                      |       |
|                         | (-)   | 88/91(96.7)   |                      |       |                      |       |
| EPBD                    | (+)   | 104/108(96.3) | 0.346(0.035–3.434)   | 0.364 |                      |       |
|                         | (-)   | 9/10(90.0)    |                      |       |                      |       |
| EPT                     | (+)   | 18/21(85.7)   | 7.917(1.234–50.793)  | 0.029 | 6.167(0.874–43.503)  | 0.068 |

---

---

|     |             |
|-----|-------------|
| (-) | 95/97(97.9) |
|-----|-------------|

---

Abbreviations: CBD, common bile duct; OR, odd, ratio; CRP, C-reactive protein; WBC, white blood count; ERCP, endoscopic retrograde cholangiopancreatography; EPBD, endoscopic papillary balloon dilation; EST, endoscopic sphincterotomy.
